# Supplementary material
Source: PubMed Central journal article supplement (PMC3340276)
Supplement: supp_M111.324921_jbc.M111.324921-1.pdf [file supp_M111.324921_jbc.M111.324921-1.pdf]

Supplemental figure 1. Protein levels in control and S2R<sup>Pgrmc1</sup>-knockdown A549 cells  
 Proteins with significant changes are in green. ND= not detectable

| Gene Name              | con<br>ave | std.dev. | shPGR<br>ave | std. dev. | t-test | fold<br>change |
|------------------------|------------|----------|--------------|-----------|--------|----------------|
| <i>IL-1 RII/CD121b</i> | 0.19       | 0.004    | 0.30         | 0.009     | 0.0093 | 1.5            |
| <i>NGAL/Lipocalin</i>  | 0.42       | 0.011    | 0.02         | 0.004     | 0.0004 | 0.1            |
| <i>IL-1 RII/CD121b</i> | 0.06       | 0.004    | 0.04         | 0.009     | 0.0389 | 0.7            |
| <i>NCAM-L1</i>         | 0.02       | 0.004    | 0.00         | 0.004     | 0.0513 | 0.2            |
| Osteopontin            | 0.06       | 0.011    | 0.04         | 0.004     | 0.0630 | 0.6            |
| <i>TIMP-1</i>          | 0.22       | 0.007    | 0.58         | 0.009     | 0.0007 | 2.7            |
| <i>TIMP-2</i>          | 0.09       | 0.004    | 0.20         | 0.022     | 0.0277 | 2.2            |
| <i>TIMP-3</i>          | 0.02       | 0.004    | 0.01         | 0.000     | 0.0377 | 0.3            |
| TNF RII/NFRSF1B        | 0.01       | 0.004    | 0.01         | 0.000     | 0.4226 | 0.8            |
| <i>EMMPRIN/CD147</i>   | 0.08       | 0.007    | 0.02         | 0.009     | 0.0161 | 0.3            |
| ALCAM/CD166            | 0.01       | 0.004    | 0.02         | 0.004     | 0.2929 | 1.7            |
| CD31/PECAM-1           | 0.01       | 0.007    | 0.01         | 0.004     | 0.6985 | 0.9            |
| CD36/SR-B3             | 0.01       | 0.004    | 0.00         | 0.004     | 0.2929 | 0.4            |
| CD44H                  | 0.02       | 0.000    | 0.00         | 0.000     | NA     | 0.0            |
| CD90/Thy 1             | 0.02       | 0.004    | 0.01         | 0.009     | 0.1548 | 0.3            |
| CD99                   | 0.01       | 0.004    | 0.02         | 0.018     | 0.5149 | 2.3            |
| <i>Cathepsin D</i>     | 0.07       | 0.008    | 0.01         | 0.004     | 0.0111 | 0.2            |
| $\beta$ IG-H3          | 0.09       | 0.004    | 0.08         | 0.007     | 0.3118 | 0.9            |
| <i>CADHERIN-13</i>     | 0.01       | 0.004    | 0.08         | 0.004     | 0.0029 | 5.9            |
| CLUSTERIN              | 0.01       | 0.004    | 0.00         | 0.004     | 0.1056 | 0.2            |
| <i>LRP-6</i>           | 0.01       | 0.004    | 0.00         | 0.000     | 0.0377 | 0.0            |
| PODOCALYXIN            | 0.01       | 0.004    | 0.00         | 0.000     | 0.0955 | 0.0            |
| Semaphorin 3A          | 0.01       | 0.004    | 0.00         | 0.000     | 0.0955 | 0.0            |
| CD59                   | 0.33       | 0.004    | 0.33         | 0.010     | 0.1982 | 1.0            |
| <i>CXCL16</i>          | 0.10       | 0.007    | 0.06         | 0.003     | 0.0169 | 0.5            |
| <i>TNF RI/NFRSF1A</i>  | 0.32       | 0.004    | 0.44         | 0.007     | 0.0015 | 1.4            |
| ECM-1                  | ND         | ND       | 0.01         | 0.004     | ND     | ND             |
| VAP-1/Aoc3             | ND         | ND       | 0.00         | 0.000     | ND     | ND             |
| TRACP/PAP/ACP5         | ND         | ND       | 0.01         | 0.014     | ND     | ND             |
| ADAM15                 | ND         | ND       | ND           | ND        | ND     | ND             |
| BMPR-IB/ALK-6          | ND         | ND       | ND           | ND        | ND     | ND             |
| Cadherin-4/R-Cadherin  | ND         | ND       | ND           | ND        | ND     | ND             |
| E-Cadherin             | ND         | ND       | ND           | ND        | ND     | ND             |
| N-Cadherin             | ND         | ND       | ND           | ND        | ND     | ND             |
| P-Cadherin             | ND         | ND       | ND           | ND        | ND     | ND             |
| VE-Cadherin            | ND         | ND       | ND           | ND        | ND     | ND             |
| CD40/TNFRSF5           | ND         | ND       | ND           | ND        | ND     | ND             |
| CEACAM-5/CD66e         | ND         | ND       | ND           | ND        | ND     | ND             |
| CHL-1/L1CAM-2          | ND         | ND       | ND           | ND        | ND     | ND             |
| CFII/THROMBIN          | ND         | ND       | ND           | ND        | ND     | ND             |
| COMP                   | ND         | ND       | ND           | ND        | ND     | ND             |

|                                            |    |    |    |    |    |    |
|--------------------------------------------|----|----|----|----|----|----|
| <b>ECM-1</b>                               | ND | ND | ND | ND | ND | ND |
| <b>EGF R/ErbB1</b>                         | ND | ND | ND | ND | ND | ND |
| <b>ENDOGLYCAN</b>                          | ND | ND | ND | ND | ND | ND |
| <b>EpCAM/TROP-1</b>                        | ND | ND | ND | ND | ND | ND |
| <b>ErbB2/HER2</b>                          | ND | ND | ND | ND | ND | ND |
| <b>ErbB3/HER3</b>                          | ND | ND | ND | ND | ND | ND |
| <b>ErbB4/HER4</b>                          | ND | ND | ND | ND | ND | ND |
| <b>ESAM</b>                                | ND | ND | ND | ND | ND | ND |
| <b>GALECTIN-2</b>                          | ND | ND | ND | ND | ND | ND |
| <b>HPRG</b>                                | ND | ND | ND | ND | ND | ND |
| <b>integrin <math>\alpha</math>3/CD49c</b> | ND | ND | ND | ND | ND | ND |
| <b>Integrin <math>\alpha</math>5/CD49e</b> | ND | ND | ND | ND | ND | ND |
| <b>Integrin <math>\alpha</math>6/CD49f</b> | ND | ND | ND | ND | ND | ND |
| <b>Integrin <math>\alpha</math>9</b>       | ND | ND | ND | ND | ND | ND |
| <b>Integrin Av/CD51</b>                    | ND | ND | ND | ND | ND | ND |
| <b>JAGGED-1</b>                            | ND | ND | ND | ND | ND | ND |
| <b>JAM-B/VE-JAM</b>                        | ND | ND | ND | ND | ND | ND |
| <b>JAM-C</b>                               | ND | ND | ND | ND | ND | ND |
| <b>LRP-6</b>                               | ND | ND | ND | ND | ND | ND |
| <b>MCAM/CD146</b>                          | ND | ND | ND | ND | ND | ND |
| <b>MEPE</b>                                | ND | ND | ND | ND | ND | ND |
| <b>MUCDHL</b>                              | ND | ND | ND | ND | ND | ND |
| <b>NECTIN-2</b>                            | ND | ND | ND | ND | ND | ND |
| <b>NECTIN-4</b>                            | ND | ND | ND | ND | ND | ND |
| <b>NEUROTRIMIN</b>                         | ND | ND | ND | ND | ND | ND |
| <b>NOTCH-1</b>                             | ND | ND | ND | ND | ND | ND |
| <b>NrCAM</b>                               | ND | ND | ND | ND | ND | ND |
| <b>Periostin/OSF-2</b>                     | ND | ND | ND | ND | ND | ND |
| <b>E-Selectin</b>                          | ND | ND | ND | ND | ND | ND |
| <b>SREC-II</b>                             | ND | ND | ND | ND | ND | ND |
| <b>SREC-I/CD62e</b>                        | ND | ND | ND | ND | ND | ND |
| <b>Stanniocalcin 1</b>                     | ND | ND | ND | ND | ND | ND |
| <b>Syndecan-1/CD138</b>                    | ND | ND | ND | ND | ND | ND |
| <b>Syndecan-1</b>                          | ND | ND | ND | ND | ND | ND |
| <b>Thrombospondin-2</b>                    | ND | ND | ND | ND | ND | ND |
| <b>TIMP 4</b>                              | ND | ND | ND | ND | ND | ND |
| <b>TROP-2</b>                              | ND | ND | ND | ND | ND | ND |
| <b>VCAM-1</b>                              | ND | ND | ND | ND | ND | ND |
| <b>VEGF R1</b>                             | ND | ND | ND | ND | ND | ND |
| <b>VEGF R2/KDR/FLK-1</b>                   | ND | ND | ND | ND | ND | ND |
